# Disturbance opens recruitment sites for bacterial colonization

David C. Vuono<sup>a</sup>, Junko Munakata-Marr<sup>a</sup>, John R. Spear<sup>a</sup>, and Jörg E. Drewes<sup>a,b,1</sup>

<sup>a</sup> NSF Engineering Research Center *ReNUWit*, Department of Civil and Environmental Engineering, Colorado School of Mines, 1500 Illinois St, Golden, CO, 80401, USA

<sup>b</sup> Chair of Urban Water Systems Engineering, Technische Universität München, Am Coulombwall 8, 85748 Garching, Germany

<sup>1</sup> Corresponding author: [jdrewes@tum.de](mailto:jdrewes@tum.de)

## Summary

10 Little is known about the role of immigration in shaping bacterial communities or the factors that may dictate success or failure of colonization by bacteria from regional species pools. To address these knowledge gaps, the influence of bacterial colonization into an ecosystem (activated sludge bioreactor) was measured through a disturbance gradient (successive decreases in the parameter solids retention time) relative to stable operational conditions.

15 Through a DNA sequencing approach, we show that the most abundant bacteria within the immigrant community have a greater probability of colonizing the receiving ecosystem, but mostly as low abundance community members. Only during the disturbance do some of these bacterial populations significantly increase in abundance beyond background levels and few cases become dominant community members post-disturbance. Two mechanisms

20 facilitate the enhanced enrichment of immigrant populations during disturbance: 1) the availability of resources left unconsumed by established species and 2) the increased availability of niche space for colonizers to establish and displace resident populations. Thus, as a disturbance decreases local diversity, recruitment sites become available to promote colonization. This work advances our understanding of microbial resource management and

25 diversity maintenance in complex ecosystems.

Keywords: Immigration | colonization | invasion | disturbance | stochastic niche theory | activated sludge | solids retention time | phylogenetic niche conservatism

## Introduction

30 Dispersal of bacteria from regional pools to form local species assemblages is facilitated by a variety of mechanisms, including atmospheric transport via transcontinental winds, hitchhiking on migrating animals, circulating ocean currents, subsurface hydrological transport, and by anthropogenic means (Gilbert et al., 2009, 2012; Grossart et al., 2010; Harding et al., 2011; de Rezende et al., 2013; Smith et al., 2013; Bräuer et al., 2014; Müller et al., 2014). However,

35 environmental filters, biotic interactions, relative fitness differences and stochastic processes (or combinations thereof) within heterogeneous ecological landscapes are the primary factors that dictate which organisms are recruited into local environments, and those that are not

40 (Chesson, 2000; Hubbell, 2001; Adler et al., 2007). At local scales, species compete for limited resources and thus respond to and affect both the abiotic (e.g., resource gradients) and biotic (e.g., competition and predation) environment (Tilman, 1982; Chase and Leibold, 2003). Diversity within local environments is then maintained by stabilizing niche differences and relative fitness differences among species, which forms the basis of co-existence theory (Chesson, 2000). Such interactions feed back to influence the strength of environmental and biotic filters, which pose as colonization barriers to immigrant organisms.

45 Although niche and neutral paradigms were developed from the macro-ecological perspective, such patterns are also pervasive in microbial ecology. While it has been argued that high dispersal rates and rapid horizontal gene transfer among bacteria and archaea may erode population structure (Doolittle, 2009; Doolittle and Zhaxybayeva, 2010) (e.g., through the acquisition of plasmids that encode for pathogenicity, antibiotic production and resistance),  
50 wild bacterial populations are now known to be non-clonal and structured into ecologically and socially cohesive populations (Hunt et al., 2008; Cordero et al., 2012; Shapiro et al., 2012; Polz et al., 2013). Thus, the congruency between 'macro' and 'micro' ecological theory can allow for predictions regarding the role of colonization into stable and unstable (i.e., disturbed) ecosystems to better understand altered states in ecosystems. Such studies will improve our  
55 understanding of human health and our microbiome; it may be possible to divert or reverse disease states in humans that are linked to differences in bacterial community structures (Ley et al., 2005; Antonopoulos et al., 2009; Faith et al., 2011; Lozupone et al., 2012; Ridaura et al., 2013).

60 Stable ecosystems act as filters, which prevent colonization of immigrant organisms. This is due to a lack of available resources and niche space, which are consumed and occupied by established species in local environments that provide localized 'ecosystem services' (Tilman, 2004). Thus, ecosystems that experience food web transitions either from primary or secondary succession (i.e., disturbance) may be more susceptible to colonization by immigrant organisms. Many examples of immigration and invasion exist in macro ecology (see (Shea and Chesson,  
65 2002)). However, surprisingly few studies have attempted to characterize the patterns of colonization in microbial communities (Jones and McMahon, 2009; Wells et al., 2014). Jones et al. found minimal effect of immigration by atmospheric deposition of bacteria into freshwater seepage lakes; the composition of abundant immigrant communities was significantly more variable and did not overlap with the composition of abundant lake bacterial communities,  
70 most likely due to dispersal limitation. However microbial communities are also known to have persistent 'seed banks' (Caporaso et al., 2011), which may contribute to microbial diversity maintenance through the increase in abundance and resuscitation of rare and dormant organisms into disproportionately active populations when conditions become optimal (Jones and Lennon, 2010).

75 Here we investigate the roles of immigration and colonization in a purely microbial ecosystem without dispersal limitation, before and during a long-term disturbance event, as well as during the successional periods that follow the disturbance. We define colonization as an increase in the abundance of taxa in a receiving environment that are also present in the source environment. Culture-independent methods were used to survey bacterial communities in a

80 full-scale activated sludge bioreactor (Vuono et al., 2013) and its associated influent domestic  
wastewater as the sole immigration source. We hypothesized that colonization limitation would  
be greatest during stable operating conditions (i.e., before and after disturbance) and would  
decrease as the ecosystem progressed towards its maximum disturbance state (see (Vuono et  
al., 2014) for complete description of disturbance). Such decreases in colonization limitation  
85 would thus be manifested as increases in taxonomic and phylogenetic similarity as well as an  
increase in the number of shared taxa between source (i.e., influent) and receiving (i.e.,  
activated sludge) environments.

## Results

90 Sewage-derived (i.e., influent) bacterial communities were surveyed throughout the time-  
course in parallel with activated sludge communities that underwent disturbance and  
secondary succession (as described by (Vuono et al., 2014)). A total of 135 samples were  
collected and the V4-V5 hypervariable region of the bacterial small-subunit (SSU) rRNA gene  
was sequenced from these samples. Of the 135 samples, 54 samples were collected from the  
influent and 81 samples were collected from the activated sludge bioreactor (triplicate samples  
95 per time-point), with 18 and 27 time-points over the 313-day time series, respectively. A total  
of 610,311 high quality amplicon reads were obtained (singletons removed) with sequence  
statistics of 1,384/13,904/4,258/4,521/2,187 (min/max/median/mean/SD, respectively). In the  
influent sequence library, 231,832 high quality sequences were recovered at an average read  
depth of 4,293 ( $\pm 2,786$  standard deviation or S.D.) sequences/sample and clustered into 1,395  
100  $_{0.03}$ OTUs. In the activated sludge sequence library, 378,479 high quality sequences were  
recovered at an average read depth of 4,672 ( $\pm 1,499$  S.D.) sequences per sample and clustered  
into 2,343  $_{0.03}$ OTUs.

**Bacterial composition and diversity of sewage-derived and sludge communities.** The majority  
of sequences from the influent libraries were mapped to bacterial phyla Firmicutes (62.0%),  
105 Proteobacteria (Alpha-2.0%; Beta-16.6%; Gamma-4.5%) and Bacteroidetes (9.5%). The majority  
of Firmicute tag-sequences were associated with order/family Clostridiales (51.8%)/  
*Lachnospiracea* (26.9%), *Ruminococcaceae* (13.5%) and *Veillonellaceae* (6.6%) and  
Lactobacillales (7.4%) / *Carnobacteriaceae* (2.9%) / and *Streptococcaceae* (3.8%). Members of  
the phylum Bacteroidetes were mainly comprised of populations of order/family Bacteroidales  
110 (7.7%) / *Bacteroidaceae* (1.6%) and *Prevotellaceae* (5.3%) (Figure 1A). For the influent libraries,  
minor fluctuations in community composition were observed at the phylum and class levels and  
showed no significant differences in compositional similarity through time (Bray-Curtis  $R^2_{\text{ADONIS}}$   
 $= 0.16$ ,  $P = 0.16$ ; Morisita-Horn  $R^2_{\text{ADONIS}} = 0.16$ ,  $P = 0.248$ ) or phylogenetic similarity (Weighted  
UniFrac,  $R^2_{\text{ADONIS}} = 0.15$ ,  $P = 0.25$ ). These results indicate temporal stability of the source  
115 communities. Community composition of the activated sludge however, was greatly affected by  
the SRT treatments (as described by (Vuono et al., 2014)) and shifted such that *K*-strategists  
(i.e., phyla Acidobacteria, Chloroflexi, Nitrospira, and Planctomycetes) were present at high  
abundance under pre- and post-disturbance conditions (30-day SRTs) but were mostly washed  
out during the 3-day SRT (Figure 1A bottom). In contrast, *r*-strategists were opportunistic and  
120 became dominant members of the community during the 3-day SRT and biomass recovery  
periods (Vuono et al., 2014)).

Mean Hill diversity of orders  ${}^0D$ ,  ${}^1D$  and  ${}^2D$  ( ${}^qD_{(p)}$  for  $q=0,1,2$ ) for the influent library were 366.6 ( $\pm 109.4$  SD), 79.5 $\pm$ 19.9, and 30.4 $\pm$ 10.4, respectively. Considerable variation in taxonomic richness,  ${}^0D$ , was observed temporally compared to orders of diversity  $q=1,2$  (Figure 1B), which indicates the lack of certainty in estimating species richness from sample data alone (Haegeman et al., 2013). First-order bacterial diversity,  ${}^1D$ , of the influent communities was significantly lower than that of the activated sludge communities, pre- and post-disturbance (145.3 $\pm$ 12.8 and 86.5 $\pm$ 12.6, respectively as reported by (Vuono et al., 2014)) (Figure 1B). Diversity of order  ${}^2D$ , which disproportionally emphasizes dominant species (i.e., a measurement of community evenness), was also lower in the influent than the activated sludge communities pre- and post-disturbance (59.9 $\pm$ 9.0 and 37.7 $\pm$ 10.3, respectively; (Vuono et al., 2014)). However, during the maximum disturbance state of the bioreactor (3-day SRT), diversity of order  ${}^1D$  and  ${}^2D$  in the activated sludge community was 21.4% and 23.0% lower than the influent diversities (62.5 $\pm$ 6.0 and 23.4 $\pm$ 2.8), respectively (Figure 1B).

**Disturbance drives phylogenetic community structure.** To provide a phylogenetic context for the drastically different diversities across sample types (influent and activated sludge) and within SRT treatments (30 days to 12 days, to 3 days, followed by a recovery period and return to 30 days), the standardized effect size of each community's mean phylogenetic distance (MPD<sub>SES</sub>) was calculated (Table S1). MPD<sub>SES</sub> is a measure of phylogenetic relatedness that can be used to investigate contemporary ecological processes that may structure community composition (Webb, 2000). Mean MPD<sub>SES</sub> values of the influent phylogenetic tree topology were consistently negative throughout the time series, which indicates phylogenetic clustering. Influent MPD<sub>SES</sub> values calculated using the taxa.labels (presence/absence) and phylogeny.pool algorithms were significantly clustered throughout the time series. Similarly, MPD<sub>SES</sub> values from the taxa.labels abundance weighted and independent swap algorithms were also consistently negative but were not significantly clustered at all time points throughout the time-series (Table S1). Based on the taxa.labels algorithm with presence/absence option, mean MPD<sub>SES</sub> values of the activated sludge increased significantly as the disturbance progressed: 0.89 $\pm$ 0.62 (pre-disturbance) to a maximum of 3.23 $\pm$ 0.48 during the 3-day SRT and recovery period followed by a return to pre-disturbance levels, 1.50 $\pm$ 0.80. These values during the 3-day SRT describe significant phylogenetic dispersion of the tree topology (i.e., limiting similarity) (MPD<sub>SES</sub>=2.95 $\pm$ 0.57,  $p<0.005$ ) and indicate that co-occurring species are significantly less related than expected by chance. These results are supported with a parallel increase in the probability of interspecific encounter (PIE), defined as 1-Simpson concentration, during the 3-day SRT (0.017 $\pm$ 0.003 to 0.041 $\pm$ 0.007) (Hurlbert, 1971). Conversely, pre- and post-disturbance communities were randomly spread across the phylogenetic tree (MPD<sub>SES</sub> values approaching zero), which indicates randomly assembled communities relative to the three null models tested. However, during the 3-day SRT (Table S1) a transition from random dispersion to significant overdispersion, or limiting similarity, was detected for each of the null models, with the exception of the independent swap algorithm. The inability of the independent swap algorithm to detect niche-based community assembly is likely a result of its known conservatism (Kembel, 2009; Armitage et al., 2012), but does not change our interpretation of phylogenetic structure.

165 Phylogenetic clustering and overdispersion are commonly interpreted as the result of  
environmental (i.e., habitat filtering) and biotic (i.e., competition) filters (Webb, 2000).  
However, we use caution in naming any particular mechanism that describes phylogenetic  
community structure because several processes (e.g., phenotypic attraction and convergent  
evolution versus niche conservatism of functional traits) may produce similar tree topologies  
170 such as phylogenetic overdispersion. Thus, caution is warranted when interpreting the  
mechanisms of community assembly based on phylogenetic community structure, particularly  
in the absence of trait information. This is due to the difficulty in distinguishing the various  
combinations of environmental filters acting on organisms, stabilizing niche differences and the  
relative fitness differences among bacterial species (HilleRisLambers et al., 2012).

**Activated sludge communities become more similar to influent during disturbance.** Bacterial  
175 communities within the bioreactor during each SRT treatment stage were compared to the  
influent (global comparison) to elucidate their taxonomic and phylogenetic similarity. It was  
hypothesized that taxonomic and phylogenetic similarity would be greatest during the 3-day  
SRT because during this period resource availability is greatest and concentration of organisms  
in the sludge is lowest (Vuono et al., 2014), which lends to increased colonization probability of  
180 arrival organisms (Tilman, 1994, 2004). Under all SRT treatments, sludge communities were  
significantly different from their immigration source (Table 1). However, for all metrics, the  
value of the  $R^2_{\text{ADONIS}}$  statistic decreased to its lowest value during the 3-day SRT, which indicates  
a moderate increase in similarity (i.e., decreased variance between treatment types by  
sequential sum of squares). To quantify this similarity, the taxonomic and phylogenetic distance  
185 between the sludge and influent communities over time is plotted (Figure 2). The mean  
phylogenetic distance (Weighted UniFrac) between influent and bioreactor communities  
( $0.63 \pm 0.06$ ) was not significantly lower during the 3-day SRT (blue box Figure 2), with pre-and  
post-disturbance distances of  $0.64 \pm 0.03$  and  $0.66 \pm 0.04$ , respectively. These results indicate that  
overall phylogenetic similarity of abundant organisms between influent and sludge did not  
190 increase during the 3 day SRT. Conversely, when rare taxa were weighted equally (unweighted  
UniFrac), the mean phylogenetic distance of influent and sludge communities decreased  
( $0.83 \pm 0.01$  pre-disturbance to  $0.68 \pm 0.02$  during disturbance). The same trend was observed  
with metrics of compositional similarity (Bray-Curtis and Morisita-Horn), which began to  
decrease during the 12-day SRT sludge wasting conditions (days 70 of study period) and  
195 decreased significantly more during the 3-day SRT. These results indicate an increase in  
similarity between the influent and bioreactor communities during the disturbance.

Colonization of individual taxa increases with disturbance progression. Overall, 40.1% of the  
OTUs were shared between influent and all sludge treatments and transition periods (Figure  
S1). However, because phylogenetic and compositional metrics (Figure 2) both showed small  
200 increases in similarity, it was unclear which contributed more to the increase in similarity:  
abundant or rare organisms. In order to answer this question, multivariate cutoff level analysis  
(MultiCoLA) was used to quantify the contribution of rare taxa to taxonomy-based beta-  
diversity metrics. Briefly, MultiCoLA removes the least abundant taxa at increasing proportions  
and correlates each reduced dataset to the full dataset to determine how each successive  
205 omission of rare taxa influences beta-diversity. This analysis revealed that each reduced dataset

strongly correlated with the full dataset with the removal of up to 50% of the least abundant OTUs (Figure S2).

210 With this information, the dataset could be quantitatively reduced (hereby referred to as the reduced dataset) to more easily visualize the contribution of abundant and rare influent OTUs that may be shared with the sludge. A two-dimensional hierarchical clustering combined with a heatmap of OTU occurrence frequencies was plotted (Figure S3) to reveal which OTUs had similar co-occurrence patterns between sample groups. The 100 most abundant OTUs were sub-sampled to visualize the dynamics of individual taxa and the relative impacts of colonization during the disturbance (Figure 3). Hierarchical clustering of samples revealed that  
215 sample types were split between influent and sludge. Sludge samples clustered based on their respective SRT operation and the biomass recovery period, while influent samples did not cluster based on any particular structure (i.e., samples were distributed randomly in a single cluster). The lack of organized structure within the influent cluster supports a consistent influent community composition throughout the study period. The distribution of OTUs was  
220 also split between two main clusters. One cluster contained 42 OTUs that were consistently found at high abundance in the influent but low abundance in the sludge (lower left and right quadrants, respectively; Figure 3). The second cluster contained 58 OTUs that were either absent in the influent and abundant in the sludge or abundant in both libraries (upper left and right quadrants, respectively; Figure 3). The clustering patterns within this cluster were mainly  
225 driven by the OTU occurrence frequencies in the sludge, in response to disturbance and recovery (below), which are representative of ecological strategies as defined by (Evans and Wallenstein, 2014).

Several patterns of OTU occurrence frequencies are evident in the heatmap. These include (1) OTUs consistently present in significant proportions in influent, sludge, or both (generalists); (2)  
230 sludge OTUs that significantly decreased during the disturbance followed by recovery to higher levels; (3) loss of some organisms after disturbance (red asterisks); (4) addition of some organisms after disturbance; (5) lack of dependence of some OTUs on SRT. Of the sludge OTUs that were lost after the disturbance, it is possible that these organisms did not recolonize because there were no detectible sequences from these OTUs in the influent. However, it is  
235 difficult to know if lack of recolonization was solely due to absence of a particular OTU in the influent because it is impossible to detect all organisms in any given sample.

If influent organisms were to establish as the activated sludge community members, the signature of successful colonization could be identified as a group of OTUs that were present in the influent, also present in the sludge, but increase in abundance beyond background levels  
240 (30-day SRT) only during the 3-day SRT (maximum disturbance). Potential colonizers would also have to be consistently abundant beyond background levels throughout the 3-day SRT. This suggests that potential colonizers have overcome a decay rate of  $0.2 \text{ d}^{-1}$ , which is derived from activated sludge model 2 (ASM2d) based on oxygen uptake under starvation (Henze et al., 1999). Of the 100 most abundant OTUs, 23 were identified to have increased significantly in  
245 abundance above 30-day SRT levels (red boxes Figure 3). Thirty additional OTUs were also identified to have increased in abundance during the 3-day SRT, above 30-day SRT levels. In addition, all of the OTUs that were identified as having these abundance patterns (53 in total)

were significantly enriched beyond background levels, as determined by a Two-Part statistic for comparison of sequence variant counts ( $p$ -values < 0.01; Figure 4). This collection of OTUs, 250  
albeit small, explains our findings from the distance-based taxonomic (Bray-Curtis, Morisita-Horn) and unweighted phylogenetic (UniFrac) calculations; combinations of abundant and rare influent taxa contribute to the increase in similarity during the disturbance periods, particularly during the 3-day SRT. However, it is still unclear why in the case of the weighted phylogenetic metric, 30-day SRT communities did not differ substantially from the 3-day SRT communities; it 255  
is possible that the phylogenetic composition of the abundant OTUs overwhelmed this signal.

**Network-based analysis reveals higher OTU co-occurrences between disturbance and influent communities.** To visualize the degree of connectedness between samples as a function of shared OTUs, a network was built of the most prevalent OTUs (~2% or 198 OTUs), which had  $\geq 150$  sequences detected study-wide, including replicates (Figure 5). In the network, samples 260  
that cluster more closely together have more OTUs shared between them. The network clearly shows that samples cluster into two main groups, either influent or sludge (denoted by edge color radiated from sample nodes, with green and blue lines representing sludge and influent samples, respectively). All of the influent samples cluster closely together with little deviation between them. Conversely, as the disturbance progresses, the 3-day SRT sludge samples 265  
deviate from the 30-day SRT cluster and approach the influent cluster. This shift in position indicates that the 3-day SRT sludge samples share more OTUs with the influent than do the 30-day SRT treatments. Each sample node radiates edges to OTUs (outer nodes) that are either shared or not shared, independent of treatment. 65% of the OTUs in this analysis were shared between influent and sludge. The bacterial phylum that shared the most OTUs between sample 270  
types were Firmicutes (55 OTUs in total) with the remaining OTUs mapped to Proteobacteria (42 OTUs in total, mostly within the Alpha, Beta and Gammaproteobacteria classes), Bacteroidetes (22 OTUs in total) and Actinobacteria (8 OTUs in total). The OTUs most frequently shared between influent and sludge, and contained the largest edge-weights or average number of sequences in an OTU, were mapped to the cosmopolitan clade of *Comamonadaceae* 275  
(OTU 1 and 3, Figure 3 and Table S2). Other shared and prevalent OTUs between influent and sludge were *Faecalibacterium prausnitzii*, *Lachnospiracea/Blautia sp.* and *Prevotella copri* (4, 5, and 23 OTUs). In summary, network-based analysis reinforces our observations of increased similarity between influent and sludge during disturbance and provides a robust method to visualize this similarity based on shared OTUs between baseline operational conditions and 280  
maximum disturbance state.

## Discussion

In this work, the influence of bacterial colonization into an ecosystem (activated sludge bioreactor) was measured through a disturbance gradient (successive decreases in solids retention time (SRT) relative to stable operating conditions). Results show an increased 285  
abundance of organisms in the sludge that were compositionally similar to those in the influent during the maximum disturbance state. Our results support the hypothesis that disturbance opens up recruitment sites for bacterial colonization. These results add to the predictive framework of microbial resource management within engineered microbial systems, but also provide insights for how to manage and promote healthy microbial communities (i.e., within

290 the human microbiome, for individuals with diseased states associated with unstable  
community structures). These results also shed light on the similarities between ‘macro’ and  
‘micro’ ecology, which show similar patterns of dispersal and colonization of ecosystems during  
disturbance (Tilman, 1994, 2004). In addition, the stability of the bioreactor ecosystem (as  
measured by the range of ecosystem processes and decrease in diversity; (Vuono et al., 2014))  
295 was compromised and manifested as a decreased resistance to invasion (i.e., niche  
opportunity) (Shea and Chesson, 2002; Shade et al., 2012). During stable operating conditions  
(flanking treatments before and after disturbance), the opposite trend was observed:  
taxonomic and phylogenetic similarities between influent and sludge decreased as well as the  
number of shared OTUs (both weighted abundance and presence/absence) between influent  
300 and sludge sequence libraries. These results could be interpreted under the ‘species-sorting’  
metacommunity paradigm (Leibold et al., 2004), as suggested by Jones et al. (Jones and  
McMahon, 2009), where spatial niche partitioning is emphasized over dispersal dynamics.

Tilman (Tilman, 2004) describes such systems under the more parsimonious framework of  
stochastic niche theory, where invading species can survive on resources left unconsumed by  
305 established species. In the case of the bioreactor communities (i.e., sludge), established species  
(i.e., *K*-strategists) were washed out of the system during the disturbance and thus dampened  
the effects of recruitment limitation. Conversely, recruitment of influent bacteria into the  
activated sludge communities was considerably lower during the pre- and post-disturbance (30-  
day SRTs). Several lines of evidence support these observations, based on the predictions of  
310 stochastic niche theory. First, pre- and post-disturbance Hill diversities (for both  ${}^1D$  and  ${}^2D$ )  
were considerably higher in pre- and post-disturbance than the maximum disturbance  
communities. Recruitment limitation is not a direct consequence of highly diverse communities,  
but rather a consequence of the low levels of available resources unconsumed by organisms  
within highly diverse communities (Tilman, 2004). Second, the concentrations of bacteria in the  
315 bioreactor during pre- and post-disturbance were an order of magnitude higher than the  
disturbance communities (Vuono et al., 2014), which indicates an environment highly saturated  
with microorganisms. In addition, the Food:Microorganism (F/M) ratio was an order of  
magnitude higher during the disturbance than during normal operating conditions (Vuono et  
al., 2014). These results all indicate increased substrate availability during the disturbance and  
320 corresponding higher proportion of colonization in the context of stochastic niche theory.

Within the context of metacommunity theory, an activated sludge bioreactor can be  
characterized as a source/sink system: source habitats (influent) are not constrained by finite  
growth and thus overflow into sink habitats (i.e., bioreactor) (Leibold et al., 2004), where  
growth rates are controlled by sludge wasting rates. We see evidence for such dynamics with  
325 the extinction of several OTUs (Figure 3, red asterisks) that were washed out of the bioreactor  
system during the disturbance but were not repopulated after the disturbance due to their  
absence within the influent. For example, two functionally important nitrite-oxidizing  
*Nitrospira*, phylogenetically constrained to sublineages I and II (OTUs 63 and 85, respectively)  
were present and abundant (as high as 4% of the community) in the bioreactor before the  
330 disturbance (Vuono et al., 2014). Not surprisingly, neither *Nitrospira* OTU was detected in the  
influent since *Nitrospira* are obligate aerobes, not thriving in environments such as the human



gut or urban sewer water infrastructure (Lücker et al., 2010; Vandewalle et al., 2012). However, the population of *Nitrospira* sublineage I was able to reestablish (i.e., regrow) after the disturbance because it was not completely washed out of the bioreactor. Yet, *Nitrospira*  
335 sublineage II was completely washed out of the system as early as the 12-day SRT and did not repopulate to a comparable amount in the bioreactor after the disturbance, most likely due to its absence in the influent.

Our results indicate that a high proportion of low-abundance OTUs were shared between influent and 30-day SRT communities (Figures 3 and S1B). This may be indicative of a taxa-time  
340 relationship, or an increase in observed taxa richness with increasing time of observation (Preston, 1960); the bioreactor was operated for an 8-month period under a 30-day SRT prior to the start of the experiment (Vuono et al., 2014), which may have allowed for more influent taxa to accumulate as rare community members in the bioreactor with time. The accumulation of influent organisms as low-abundance activated sludge members, which displayed opportunistic  
345 growth during the 3-day SRT, may be an example of how dormancy and rarity contribute to diversity maintenance within microbial ecosystems (Jones and Lennon, 2010). We cannot definitively say in the current study that low-abundance community members are indeed dormant using the current methods, as rare members may be active but may not contribute to overall community structure and function. Nonetheless, environmental (abiotic) and biotic  
350 filters (species interactions), which form the basis of co-existence theory, play a large role in regulating the colonization ability of immigrants to shape local species assemblages (Chesson, 2000).

Many microbial studies have aimed to determine the relative contributions of such ecological forcing mechanisms by calculating the phylogenetic relatedness of communities relative to null  
355 expectations (Horner-Devine and Bohannan, 2006; Armitage et al., 2012; Stegen et al., 2012; Wang et al., 2012; Meuser et al., 2013; Evans and Wallenstein, 2014). Phylogenies that are either clustered or overdispersed have traditionally been interpreted to reflect environmental filters (i.e., habitat filtering) or biological interactions (i.e., competitive exclusion), respectively, that are responsible for the assembly of local communities (Webb, 2000). However, given the  
360 assumption that phylogenetic relatedness is a proxy for trait and niche similarity, the declaration of assembly mechanisms should be used cautiously (Mayfield and Levine, 2010; HilleRisLambers et al., 2012). This may be especially true for bacteria, due to their high dispersal rates and genetic recombination rates (Hunt et al., 2008; Polz et al., 2013; Cordero and Polz, 2014). In the case of the sludge communities, we observed phylogenetic overdispersion during  
365 the maximum disturbance state (3-day SRT) followed by a shift to random dispersion during normal operating conditions (30-day SRT). Interestingly, Loreau et al. (Loreau and Mouquet, 1999) found that immigration plays a large role in competitive communities, which would coincide with our observations if indeed the overdispersed community at 3-day SRT could be explained by competitive exclusion. Nonetheless, whatever the mechanism that caused this  
370 shift in phylogenetic structure, ecosystems processes in the bioreactor, such as nitrification, denitrification and phosphorus removal, were greatly impaired by the disturbance (Vuono et al., 2014). Thus, future studies should elucidate if phylogenetic overdispersion is a property of disturbed ecosystems, as a way to gauge ecosystem health and resistance to invasion.

## Experimental Procedures

375 **Bioreactor operation.** A full-scale decentralized activated sludge bioreactor treating domestic  
wastewater was operated through time and at 3 different solids retention times (SRTs): 30, 12  
and 3-days as described by Vuono et al. (Vuono et al., 2014). Briefly, hydraulic retention time  
(HRT: 24 hrs.) and SRT were decoupled through biomass separation (ultrafiltration membranes  
with a cut-off of 0.05 $\mu$ m) in a sequencing batch membrane bioreactor. SRT was managed  
380 through controlled wasting of return activated sludge.

**Sampling, Amplification, and Sequencing.** All biological samples for each time-point  
observation were collected in triplicate. Activated sludge samples were collected as described  
by Vuono et al. (Vuono et al., 2014). Influent samples were collected from treatment plant  
headworks post primary screening. All samples were stored at -20 °C prior to processing. DNA  
385 was extracted within one month of sampling with MoBio's PowerBiofilm DNA extraction kit  
(Carlsbad, CA) following manufacturer's protocol with a 1-minute bead-beating step for cellular  
lysis. Barcoded small sub-unit (SSU) rRNA gene primers 515f-927r were incorporated with  
adapter sequences for the GSFLX-Titanium platform of the Roche 454 Pyrosequencing  
technology (as described in (Vuono et al., 2014)).

390 **SSU rRNA processing, quality control, and diversity analysis.** SSU rRNA gene amplicons  
generated from pyrosequencing were binned by barcode and quality filtered with the  
'split\_libraries.py' script in the Quantitative Insights Into Microbial Ecology (QIIME v1.8-dev)  
software (Caporaso et al., 2010). Sequences with errors in the barcode or primer, lengths  
shorter than 400nt or longer than 460nt, a quality score <50, homopolymer run greater than 6  
395 nt, or which contained ambiguous base-calls were discarded from downstream analysis. The  
remaining sequences were corrected for homopolymer errors with Acacia (Bragg et al., 2012).  
Chimeric sequences were identified with UCHIME under reference mode and *de novo* mode  
(Edgar et al., 2011). The remaining 613,321 sequences were processed in Mothur (Schloss et al.,  
2009) as outlined by Schloss SOP version data 2014/15/02. Taxonomic classification of all  
400 remaining sequences was implemented with the RDP Classifier (Wang et al., 2007) at 80%  
bootstrap confidence against the Greengenes 16S rRNA database (13\_5 release) (DeSantis et  
al., 2006). Singletons were discarded from downstream analysis prior to diversity calculations. A  
phylogenetic tree was constructed from the filtered alignment with FastTree. Unweighted and  
weighted UniFrac distance matrices were calculated from the phylogenetic tree. Beta diversity  
405 metrics (i.e., Bray-Curtis dissimilarities and Morisita-Horn distances) were derived from a  
rarefied operational taxonomic units (OTU) table from the sample with lowest sequencing  
depth. Diversity analyses were carried out in the R environment for statistical computing,  
QIIME, Mothur, and Explicet (See *SI Materials and Methods* for complete description of  
diversity analysis). All sequence data generated in this study are publicly available in the MG-  
410 RAST database under the accession No. 4569429.3.

## Acknowledgments

The material presented is based in part upon work supported by the National Science  
Foundation under Cooperative Agreement EEC-1028968. We owe many thanks to Dave

415 Armitage, William Navidi, Tzahi Cath, Terry Reid, Lloyd Johnson, Dean Heil, and Chuck Pepe-  
Ranney for thoughtful discussions and suggestions on the manuscript.

### **Conflict of Interest**

The authors declare no conflict of interest.

### **References**

- 420 Adler, P.B., Hillerislambers, J., and Levine, J.M. (2007) A niche for neutrality. *Ecol. Lett.* **10**: 95–  
104.
- Antonopoulos, D. a, Huse, S.M., Morrison, H.G., Schmidt, T.M., Sogin, M.L., and Young, V.B.  
(2009) Reproducible community dynamics of the gastrointestinal microbiota following  
antibiotic perturbation. *Infect. Immun.* **77**: 2367–75.
- 425 Armitage, D.W., Gallagher, K.L., Youngblut, N.D., Buckley, D.H., and Zinder, S.H. (2012)  
Millimeter-scale patterns of phylogenetic and trait diversity in a salt marsh microbial mat.  
*Front. Microbiol.* **3**: 1–16.
- Bragg, L., Stone, G., Imelfort, M., Hugenholtz, P., and Tyson, G.W. (2012) Fast, accurate error-  
correction of amplicon pyrosequences using Acacia. *Nat. Methods* **9**: 425–426.
- 430 Bräuer, S., Vuono, D., Carmichael, M.J., Pepe-Ranney, C., Strom, A., Rabinowitz, E., et al. (2014)  
Microbial sequencing analyses suggest the presence of a fecal veneer on indoor climbing  
wall holds. *Curr. Microbiol.*
- Caporaso, J.G., Kuczynski, J., Stombaugh, J., Bittinger, K., Bushman, F.D., Costello, E.K., et al.  
(2010) QIIME allows analysis of high- throughput community sequencing data. *Nat.*  
*Methods* **7**: 335–336.
- 435 Caporaso, J.G., Paszkiewicz, K., Field, D., Knight, R., and Gilbert, J. a (2011) The Western English  
Channel contains a persistent microbial seed bank. *ISME J.* 1–5.
- Chase, J.M. and Leibold, M.A. (2003) *Ecological Niches: Linking Classical and Contemporary*  
*Approaches* Univerisity Chicago Press, London, UK.
- 440 Chesson, P. (2000) Mchanisms of Maintenance of Species Diversity. *Annu. Rev. Ecol. Syst.* **31**:  
343–358.
- Cordero, O.X. and Polz, M.F. (2014) Explaining microbial genomic diversity in light of  
evolutionary ecology. *Nat. Rev. Microbiol.* **12**: 263–73.
- 445 Cordero, O.X., Wildschutte, H., Kirkup, B., Proehl, S., Ngo, L., Hussain, F., et al. (2012) Ecological  
populations of bacteria act as socially cohesive units of antibiotic production and  
resistance. *Science (80-. ).* **337**: 1228–1231.
- DeSantis, T.Z., Hugenholtz, P., Larsen, N., Rojas, M., Brodie, E.L., Keller, K., et al. (2006)  
Greengenes, a chimera-checked 16S rRNA gene database and workbench compatible with  
ARB. *Appl. Environ. Microbiol.* **72**: 5069–72.
- 450 Doolittle, W.F. (2009) Eradicating typological thinking in prokaryotic systematics and evolution.  
*Cold Spring Harb. Symp. Quant. Biol.* **74**: 197–204.
- Doolittle, W.F. and Zhaxybayeva, O. (2010) Metagenomics and the Units of Biological  
Organization. *Bioscience* **60**: 102–112.
- Edgar, R.C., Haas, B.J., Clemente, J.C., Quince, C., and Knight, R. (2011) UCHIME improves  
sensitivity and speed of chimera detection. *Bioinformatics* **27**: 2194–200.

- 455 Evans, S.E. and Wallenstein, M.D. (2014) Climate change alters ecological strategies of soil bacteria. *Ecol. Lett.* **17**: 155–64.
- Faith, J.J., McNulty, N.P., Rey, F.E., and Gordon, J.I. (2011) Predicting a Human Gut Microbiota's Response to Diet in Gnotobiotic Mice. **333**: 101–104.
- 460 Gilbert, J. a, Field, D., Swift, P., Newbold, L., Oliver, A., Smyth, T., et al. (2009) The seasonal structure of microbial communities in the Western English Channel. *Environ. Microbiol.* **11**: 3132–9.
- Gilbert, J. a, Steele, J. a, Caporaso, J.G., Steinbrück, L., Reeder, J., Temperton, B., et al. (2012) Defining seasonal marine microbial community dynamics. *ISME J.* **6**: 298–308.
- 465 Grossart, H.-P., Dziallas, C., Leunert, F., and Tang, K.W. (2010) Bacteria dispersal by hitchhiking on zooplankton. *Proc. Natl. Acad. Sci.* **107**: 11959–64.
- Haegeman, B., Hamelin, J., Moriarty, J., Neal, P., Dushoff, J., and Weitz, J.S. (2013) Robust estimation of microbial diversity in theory and in practice. *ISME J.* **7**: 1092–101.
- Harding, T., Jungblut, A.D., Lovejoy, C., and Vincent, W.F. (2011) Microbes in high arctic snow and implications for the cold biosphere. *Appl. Environ. Microbiol.* **77**: 3234–43.
- 470 Henze, M., Gujer, W., Mino, T., Matsuo, T., Wentzel, M., Marais, G., and Van Loosdrecht, M. (1999) Activated Sludge Model No.2d, ASM2d. *Water Sci. Technol.* **39**: 165–182.
- HilleRisLambers, J., Adler, P.B., Harpole, W.S., Levine, J.M., and Mayfield, M.M. (2012) Rethinking Community Assembly through the Lens of Coexistence Theory. *Annu. Rev. Ecol. Evol. Syst.* **43**: 227–248.
- 475 Horner-Devine, M.C. and Bohannan, B.J.M. (2006) Phylogenetic clustering and overdispersion in bacterial communities. *Ecology* **87**: S100–8.
- Hubbell, S.P. (2001) *The Unified Neutral Theory of Biodiversity and Biogeography* Princeton University Press, Princeton, NJ, USA.
- Hunt, D.E., David, L.A., Gevers, D., Preheim, S.P., Alm, E.J., and Polz, M.F. (2008) Resource partitioning and sympatric differentiation among closely related bacterioplankton. *Science (80- )*. **320**: 1081–1085.
- 480 Hurlbert, S.H. (1971) The Nonconcept of Species Diversity : A Critique and Alternative Parameters. *Ecology* **52**: 577–586.
- Jones, S.E. and Lennon, J.T. (2010) Dormancy contributes to the maintenance of microbial diversity. *Proc. Natl. Acad. Sci.* **107**: 5881–6.
- 485 Jones, S.E. and McMahon, K.D. (2009) Species-sorting may explain an apparent minimal effect of immigration on freshwater bacterial community dynamics. *Environ. Microbiol.* **11**: 905–13.
- Kembel, S.W. (2009) Disentangling niche and neutral influences on community assembly: assessing the performance of community phylogenetic structure tests. *Ecol. Lett.* **12**: 949–60.
- 490 Leibold, M.A., Holyoak, M., Mouquet, N., Amarasekare, P., Chase, J.M., Hoopes, M.F., et al. (2004) The metacommunity concept: a framework for multi-scale community ecology. *Ecol. Lett.* **7**: 601–613.
- 495 Ley, R.E., Bäckhed, F., Turnbaugh, P., Lozupone, C. a, Knight, R.D., and Gordon, J.I. (2005) Obesity alters gut microbial ecology. *Proc. Natl. Acad. Sci.* **102**: 11070–5.
- Loreau, M. and Mouquet, N. (1999) Immigration and the Maintenance of Local Species Diversity. *Am. Nat.* **154**: 427–440.

- 500 Lozupone, C. a, Stombaugh, J.I., Gordon, J.I., Jansson, J.K., and Knight, R. (2012) Diversity, stability and resilience of the human gut microbiota. *Nature* **489**: 220–30.
- Lücker, S., Wagner, M., Maixner, F., Pelletier, E., Koch, H., Vacherie, B., et al. (2010) A Nitrospira metagenome illuminates the physiology and evolution of globally important nitrite-oxidizing bacteria. *Proc. Natl. Acad. Sci.* **107**: 13479–13484.
- 505 Mayfield, M.M. and Levine, J.M. (2010) Opposing effects of competitive exclusion on the phylogenetic structure of communities. *Ecol. Lett.* **13**: 1085–93.
- Meuser, J.E., Baxter, B.K., Spear, J.R., Peters, J.W., Posewitz, M.C., and Boyd, E.S. (2013) Contrasting patterns of community assembly in the stratified water column of Great Salt Lake, Utah. *Microb. Ecol.* **66**: 268–80.
- 510 Müller, A.L., de Rezende, J.R., Hubert, C.R.J., Kjeldsen, K.U., Lagkouvardos, I., Berry, D., et al. (2014) Endospores of thermophilic bacteria as tracers of microbial dispersal by ocean currents. *ISME J.* **8**: 1153–65.
- Polz, M.F., Alm, E.J., and Hanage, W.P. (2013) Horizontal gene transfer and the evolution of bacterial and archaeal population structure. *Trends Genet.* **29**: 170–5.
- Preston, F.W. (1960) Time and space and the variation of species. *Ecology* **41**: 611–627.
- 515 De Rezende, J.R., Kjeldsen, K.U., Hubert, C.R.J., Finster, K., Loy, A., and Jørgensen, B.B. (2013) Dispersal of thermophilic Desulfotomaculum endospores into Baltic Sea sediments over thousands of years. *ISME J.* **7**: 72–84.
- Ridaura, V.K., Faith, J.J., Rey, F.E., Cheng, J., Duncan, A.E., Kau, A.L., et al. (2013) Gut microbiota from twins discordant for obesity modulate metabolism in mice. *Science (80-. ).* **341**: 1241214–1–10.
- 520 Schloss, P.D., Westcott, S.L., Ryabin, T., Hall, J.R., Hartmann, M., Hollister, E.B., et al. (2009) Introducing mothur: open-source, platform-independent, community-supported software for describing and comparing microbial communities. *Appl. Environ. Microbiol.* **75**: 7537–41.
- 525 Shade, A., Peter, H., Allison, S.D., Baho, D.L., Berga, M., Bürgmann, H., et al. (2012) Fundamentals of microbial community resistance and resilience. *Front. Microbiol.* **3**: 417.
- Shapiro, B.J., Friedman, J., Cordero, O.X., Preheim, S.P., Timberlake, S.C., Szabó, G., et al. (2012) Population genomics of early events in the ecological differentiation of bacteria. *Science* **336**: 48–51.
- 530 Shea, K. and Chesson, P. (2002) Community ecology theory as a framework for biological invasions. *Trends Ecol. Evol.* **17**: 170–176.
- Smith, D.J., Timonen, H.J., Jaffe, D. a, Griffin, D.W., Birmele, M.N., Perry, K.D., et al. (2013) Intercontinental dispersal of bacteria and archaea by transpacific winds. *Appl. Environ. Microbiol.* **79**: 1134–9.
- 535 Stegen, J.C., Lin, X., Konopka, A.E., and Fredrickson, J.K. (2012) Stochastic and deterministic assembly processes in subsurface microbial communities. *ISME J.* **6**: 1653–64.
- Tilman, D. (1994) Competition and biodiversity in spatially structured habitats. *Ecology* **75**: 2–16.
- 540 Tilman, D. (2004) Niche tradeoffs, neutrality, and community structure: a stochastic theory of resource competition, invasion, and community assembly. *Proc. Natl. Acad. Sci.* **101**: 10854–61.

- Tilman, D. (1982) Resource Competition and Community Structure Princeton University Press, New Jersey.
- 545 Vandewalle, J.L., Goetz, G.W., Huse, S.M., Morrison, H.G., Sogin, M.L., Hoffmann, R.G., et al. (2012) Acinetobacter, Aeromonas and Trichococcus populations dominate the microbial community within urban sewer infrastructure. *Environ. Microbiol.* **14**: 2538–52.
- Vuono, D., Benecke, J., Henkel, J., Navidi, W., Cath, T.Y., Munakata-Marr, J., et al. (2014) Disturbance and temporal partitioning of the activated sludge metacommunity. *ISME J.* **In Press**:
- 550 Vuono, D., Henkel, J., Benecke, J., Cath, T.Y., Reid, T., Johnson, L., and Drewes, J.E. (2013) Flexible hybrid membrane treatment systems for tailored nutrient management: A new paradigm in urban wastewater treatment. *J. Memb. Sci.* **446**: 34–41.
- Wang, J., Soininen, J., He, J., and Shen, J. (2012) Phylogenetic clustering increases with elevation for microbes. *Environ. Microbiol. Rep.* **4**: 217–226.
- 555 Wang, Q., Garrity, G.M., Tiedje, J.M., and Cole, J.R. (2007) Naive Bayesian classifier for rapid assignment of rRNA sequences into the new bacterial taxonomy. *Appl. Environ. Microbiol.* **73**: 5261–7.
- Webb, C.O. (2000) Exploring the Phylogenetic Structure of Ecological Communities: An Example for Rain Forest Trees. *Am. Nat.* **156**: 145–155.
- 560 Wells, G.F., Wu, C.H., Piceno, Y.M., Eggleston, B., Brodie, E.L., Desantis, T.Z., et al. (2014) Microbial biogeography across a full-scale wastewater treatment plant transect: evidence for immigration between coupled processes. *Appl. Microbiol. Biotechnol.* **98**: 4723–36.

565

### Table and Figure Legends

570 **Table 1.** Permutational MANOVA (ADONIS) analysis of taxonomic (Bray-Curtis and Morisita-Horn) and phylogenetic (Weighted UniFrac) similarity between source (i.e., influent) communities and their respective sludge communities, by SRT treatment. Significance in the ADONIS R<sup>2</sup> statistic is based on 999 randomizations; P values were <0.001 for all analyses.

| <b>Comparison</b>                  | <b>Bray-Curtis<br/>R<sup>2</sup></b> | <b>Morisita-Horn<br/>R<sup>2</sup></b> | <b>Weighted<br/>UniFrac<br/>R<sup>2</sup></b> |
|------------------------------------|--------------------------------------|----------------------------------------|-----------------------------------------------|
| 30 Day SRT vs. Influent            | 0.553                                | 0.697                                  | 0.718                                         |
| 12 Day SRT vs. Influent            | 0.493                                | 0.619                                  | 0.695                                         |
| 3 Day SRT vs. Influent             | 0.384                                | 0.512                                  | 0.615                                         |
| Biomass Recovery vs. Influent      | 0.456                                | 0.584                                  | 0.653                                         |
| 30 Day SRT (Recovery) vs. Influent | 0.551                                | 0.682                                  | 0.715                                         |

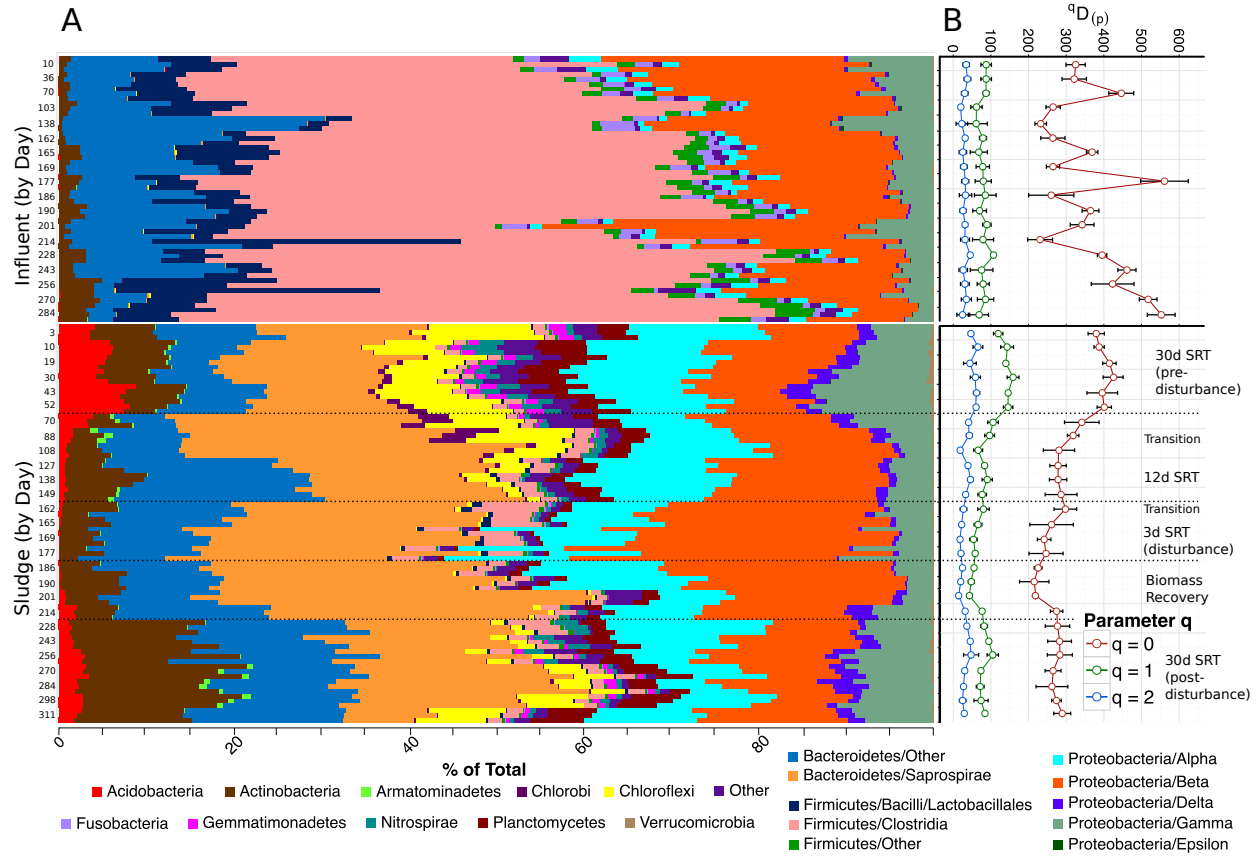

**Figure 1.** (A) Taxonomic summary of influent and sludge libraries, sorted by day of study with (B) corresponding Hill diversities. Error Bars in B represent the 95% confidence interval estimated from a t-distribution. Sludge Hill diversities in B have been adapted from (Vuono et al., 2014).

575

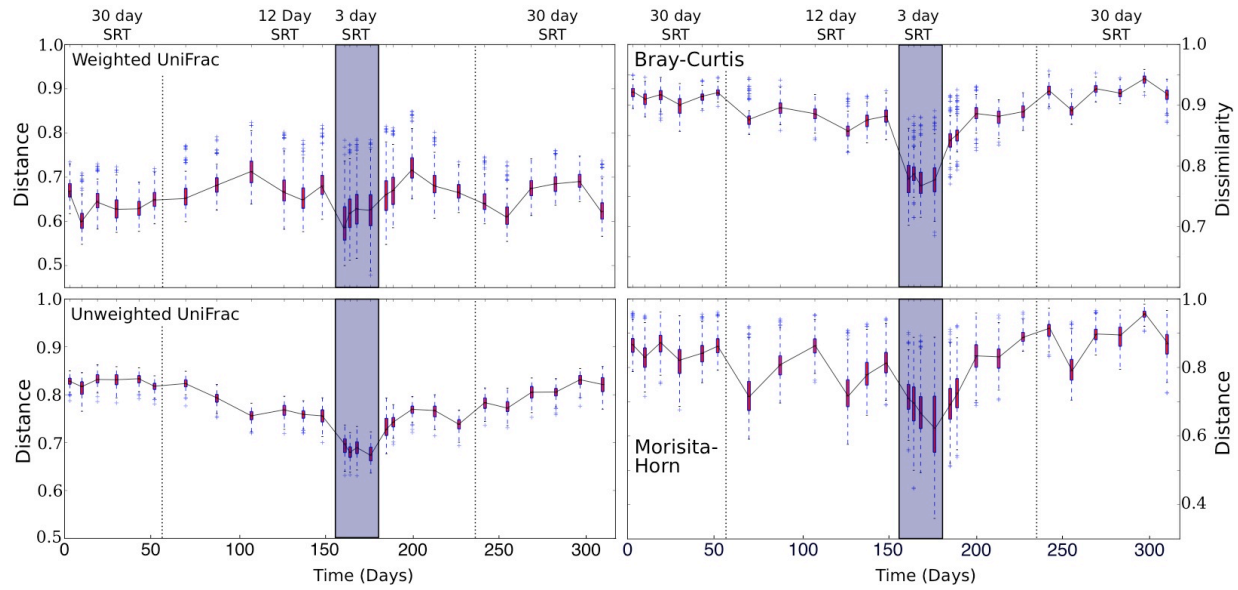

580 **Figure 2.** Comparison of (left column) phylogenetic and (right column) compositional distance of sludge libraries by study day, relative to influent libraries. Blue rectangle represents the 3-day SRT time period, or maximum disturbance state. Error bars represent the interquartile range of boxplots with outlier datum points are shown.



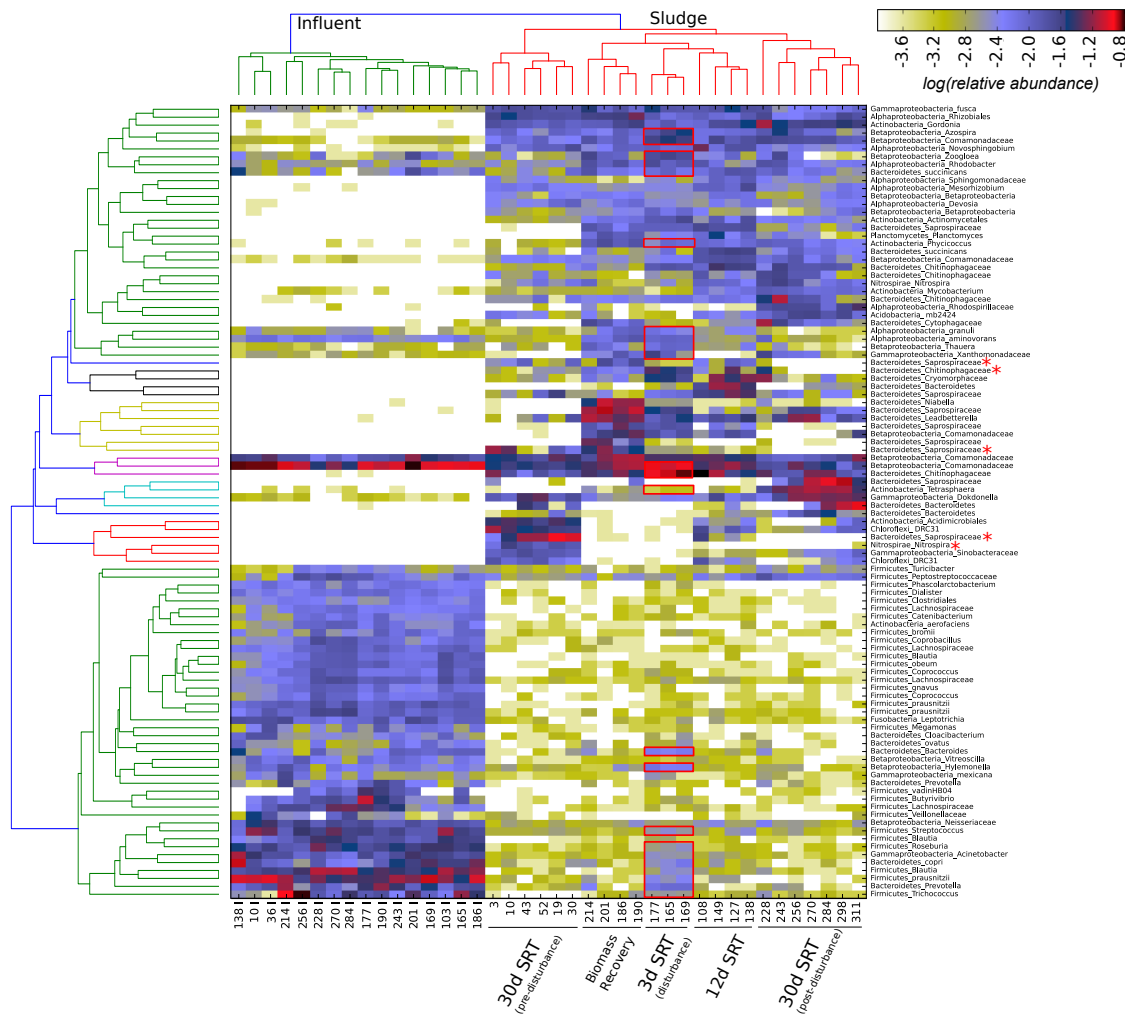

**Figure 3.** Heatmap and cluster analysis (Bray-Curtis; complete linkage) of the 100 most abundant OTUs in influent and sludge libraries; relative abundances are log transformed for visualization purposes. OTUs (y-axis) and samples (x-axis) are clustered based on similar abundance and occurrence patterns. Taxonomic identification of each OTU is shown on the right sidebar, starting with phylum (or class for Proteobacteria) and ending with the highest taxonomic classification assigned for that OTU. Red boxes capture the influent OTUs that increased in abundance in the bioreactor during the 3-day SRT, although other groups increased during 12-day SRT and biomass recovery as well. Red asterisks highlight the OTUs that did not recolonize to a comparable amount after disturbance based on limited representation in the sludge.

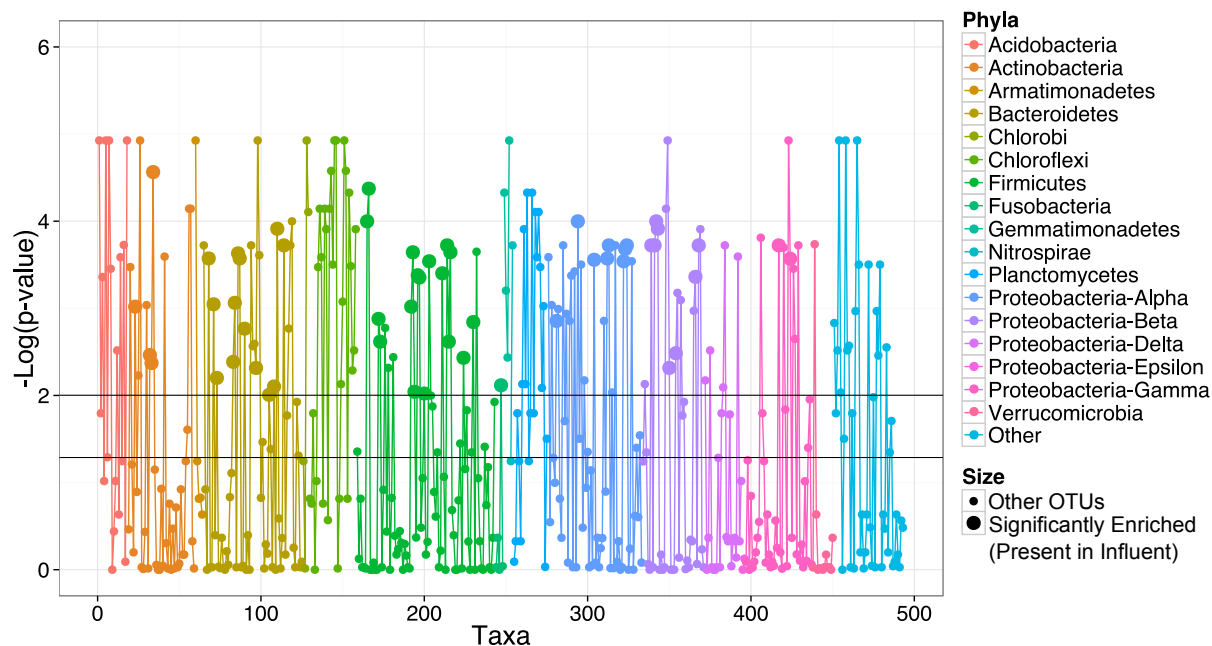

**Figure 4.** Manhattan plot, which displays negative log transformed p-values from all two-part tests for each OTU detected between 30-day and 3-day SRT operations. Values above 2 (top horizontal line;  $\alpha = 0.01$ ) represent OTUs that have significantly different abundance distributions, either enriched or depleted during the 3-day SRT (bottom horizontal line represents  $\alpha = 0.05$ ). The distinction between enriched or depleted OTUs is shown in Figure S4. Fifty-three OTUs (Table S2) were identified as being significantly enriched in the bioreactor from the influent during the 3-day SRT (represented as large data points). Colors correspond to different phyla and are ordered by taxonomy line. Phyla in the “Other” category (<1% abundance) are comprised of Spirochaetes, Synergistetes, Cyanobacteria, Elusimicrobia, Fibrobacteres, and candidate divisions BHI80-139, BRC1, FBP, GN02, GN04, GOUTA4, MVP-21, NKB19, OD1, OP3, SR1, TM6, TM7, WPS-2, and WS3.

595

600
